# Supplementary material for: Steric versus electronic effects in six-co-ordinate d0 cis-bis(imido) molybdenum complexes †
Source: Royal Society of Chemistry journal article supplement (doi:10.1039/b003998p), 2000-01-01
Supplement: b003998p.doc [file b003998p.doc]

**Supplementary Information**

**Computational Data**

Table 1. Selected Bond lengths (Å) and angles (°) for the three isomers of the models [Mo(NR)2Cl2(PH3)2] (R = H, Me, Ph)

Table 2. Selected Bond lengths (Å) and angles (°) for the three isomers of the model [Mo(NH)2Cl2(PMe3)2]

Figure. Final optimized geometries of the most stable isomers of the models [Mo(NMe)2Cl2(PH3)2] (right) and [Mo(NPh)2Cl2(PH3)2] (left) (hydrogen atoms of Me and Ph groups are not displayed).

|  | *cis*-Cl,*trans*-PH3 | | | *trans*-Cl,*cis*-PH3 | | | *cis*-Cl,*cis*-PH3 | | |
| --- | --- | --- | --- | --- | --- | --- | --- | --- | --- |
|  | R=H | R=Me | R=Ph | R=H | R=Me | R=Ph | R=H | R=Me | R=Ph |
| Relative energies | + 2.4 | +1.6 | +3.6 | 0.0 | 0.0 | +2.5 | + 1.6 | +0.7 | 0.0 |
|  |  |  |  |  |  |  |  |  |  |
| Mo-N1 | 1.780 | 1.786 | 1.796 | 1.746 | 1.751 | 1.768 | 1.770 | 1.726 | 1.786 |
| Mo-N2 | 1.775 | 1.788 | 1.796 | 1.745 | 1.750 | 1.768 | 1.746 | 1.768 | 1.774 |
| Mo-Cl1 | 2.498 | 2.504 | 2.503 | 2.390 | 2.395 | 2.394 | 2.340 | 2.365 | 2.351 |
| Mo-Cl2 | 2.542 | 2.495 | 2.503 | 2.376 | 2.396 | 2.394 | 2.668 | 2.679 | 2.659 |
| Mo-P1 | 2.484 | 2.477 | 2.473 | 2.760 | 2.748 | 2.683 | 2.491 | 2.487 | 2.473 |
| Mo-P2 | 2.485 | 2.475 | 2.473 | 2.756 | 2.746 | 2.681 | 2.650 | 2.601 | 2.613 |
|  |  |  |  |  |  |  |  |  |  |
| N1-Mo-N2 | 104.7 | 104.0 | 103.4 | 108.2 | 106.6 | 105.3 | 107.6 | 105.1 | 104.3 |
| N1-Mo-Cl1 | 167.3 | 169.5 | 168.3 | 99.8 | 100.2 | 102.3 | 104.3 | 104.2 | 105.3 |
| N1-Mo-Cl2 | 86.2 | 86.4 | 88.3 | 100.6 | 99.5 | 97.6 | 150.8 | 151.9 | 152.8 |
| N1-Mo-P1 | 97.8 | 102.2 | 103.4 | 166.4 | 167.0 | 169.4 | 91.7 | 91.8 | 89.2 |
| N1-Mo-P2 | 98.4 | 98.2 | 93.9 | 85.1 | 86.2 | 85.3 | 91.6 | 99.0 | 95.1 |
| N2-Mo-Cl1 | 88.1 | 86.4 | 88.3 | 99.8 | 99.5 | 97.7 | 107.2 | 105.6 | 107.3 |
| N2-Mo-Cl2 | 169.1 | 169.4 | 168.3 | 100.5 | 100.2 | 102.2 | 91.0 | 85.4 | 89.2 |
| N2-Mo-P1 | 103.4 | 97.0 | 93.9 | 85.3 | 86.3 | 85.1 | 87.2 | 86.4 | 84.9 |
| N2-Mo-P2 | 103.0 | 100.3 | 103.4 | 166.6 | 167.1 | 169.2 | 158.2 | 154.2 | 157.4 |
| Cl1-Mo-Cl2 | 81.0 | 83.3 | 80.0 | 145.0 | 146.7 | 146.9 | 90.8 | 93.4 | 92.6 |
| Cl1-Mo-P1 | 79.1 | 74.9 | 75.1 | 75.7 | 78.7 | 72.7 | 153.5 | 156.4 | 157.6 |
| Cl1-Mo-P2 | 78.2 | 80.9 | 83.5 | 75.8 | 76.3 | 78.2 | 76.7 | 76.7 | 77.9 |
| Cl2-Mo-P1 | 74.4 | 82.5 | 83.5 | 77.8 | 76.0 | 78.0 | 66.3 | 66.9 | 68.3 |
| Cl2-Mo-P2 | 75.1 | 78.8 | 75.1 | 77.9 | 78.6 | 77.4 | 67.4 | 68.8 | 68.4 |
| P1-Mo-P2 | 144.2 | 149.1 | 152.0 | 81.3 | 80.9 | 84.3 | 82.0 | 83.8 | 83.9 |
|  |  |  |  |  |  |  |  |  |  |
| Mo-N1-R1 | 129.4 | 144.8 | 158.4 | 158.9 | 164.3 | 170.7 | 138.8 | 143.3 | 144.6 |
| Mo-N2-R2 | 130.2 | 144.6 | 158.4 | 160.6 | 164.9 | 171.1 | 163.9 | 152.1 | 162.1 |

Table 1. Selected Bond lengths (Å) and angles (°) for the three isomers of the models [Mo(NR)2Cl2(PH3)2] (R = H, Me, Ph)

|  |  |  |  |
| --- | --- | --- | --- |
|  | **I** | **II** | **III** |
| Mo-N1 | 1.778 | 1.777 | 1.759 |
| Mo-N2 | 1.786 | 1.752 | 1.805 |
| Mo-Cl1 | 2.566 | 2.405 | 2.386 |
| Mo-Cl2 | 2.511 | 2.418 | 2.543 |
| Mo-P1 | 2.506 | 2.759 | 2.506 |
| Mo-P2 | 2.506 | 2.650 | 2.659 |
|  |  |  |  |
| N1-Mo-N2 | 104.9 | 109.4 | 104.9 |
| N1-Mo-Cl1 | 169.3 | 97.2 | 104.4 |
| N1-Mo-Cl2 | 87.0 | 100.6 | 157.7 |
| N1-Mo-P1 | 101.7 | 165.1 | 90.5 |
| N1-Mo-P2 | 101.7 | 84.9 | 87.3 |
| N2-Mo-Cl1 | 85.7 | 101.4 | 104.6 |
| N2-Mo-Cl2 | 168.1 | 94.5 | 88.9 |
| N2-Mo-P1 | 95.5 | 84.8 | 82.5 |
| N2-Mo-P2 | 95.5 | 163.9 | 167.2 |
| Cl1-Mo-Cl2 | 82.4 | 150.7 | 88.5 |
| Cl1-Mo-P1 | 76.8 | 70.9 | 166.9 |
| Cl1-Mo-P2 | 76.8 | 83.5 | 75.6 |
| Cl2-Mo-P1 | 81.8 | 82.3 | 73.7 |
| Cl2-Mo-P2 | 81.8 | 75.1 | 78.3 |
| P1-Mo-P2 | 150.5 | 81.7 | 93.6 |
| Mo-N1-H1 | 128.6 | 136.6 | 155.6 |
| Mo-N2-H2 | 127.5 | 165.0 | 118.15 |

Table 2. Selected Bond lengths (Å) and angles (°) for the three isomers of the model [Mo(NH)2Cl2(PMe3)2]

Figure. Final optimized geometries of the most stable isomers of the models [Mo(NMe)2Cl2(PH3)2] (right) and [Mo(NPh)2Cl2(PH3)2] (left) (hydrogen atoms of Me and Ph groups are not displayed).
